# Supplementary material for: Comparative Pharmacokinetic Study of Three Major Bioactive Components in the Normal and Different Courses of Liver‐Stagnation and Spleen‐Deficiency Syndrome Depressive Rats after Intragastric Administration of Zhi‐Zi‐Hou‐Po Decoction
Source: Hindawi journal article supplement (doi:10.1155/2022/8657616), 2022-01-01
Supplement: f1 [file 8657616.f1.pdf]

**Comparative pharmacokinetic study of three major bioactive components in normal and different course of liver-stagnation and spleen-deficiency syndrome depressive rats after intragastric administration of Zhi-Zi-Hou-Po decoction**

Kaiwen Luo\*, Mengdie Wang, Xiangxiang Pan, Yadong Xing

School of Pharmacy, Bengbu Medical University, Bengbu, 233030, China

**Corresponding author:**

Dr. Kaiwen Luo

School of Pharmacy, Bengbu Medical University

Bengbu, 233030, China

Tel: +86 0552-3175452

E-mail addresses: kevinrowe@163.com

## Supplemental File

### Text S1: The conversion rule of oral dose of ZZHPD and PX.

As recorded in *Shang-Han-Lun (Treatise on Febrile Caused by Cold)*, the oral dose of ZZHPD is 81.4 g/d (ZZ 9 g, HP 62.4 g and ZS 10 g) for a human being. In consideration of the average weight of human is 60 kg, the oral dose is 1.36 g/kg/d. After multiply by the reduction coefficient, which is 6.3, between human and rat, the oral dose for rat is 8.5 g/kg/d.

The recommended oral dose of paroxetine for human is 20 mg/d, then the oral dose for rat is 2.1 mg/kg/d according to the same conversion way.

### Animals experimental design

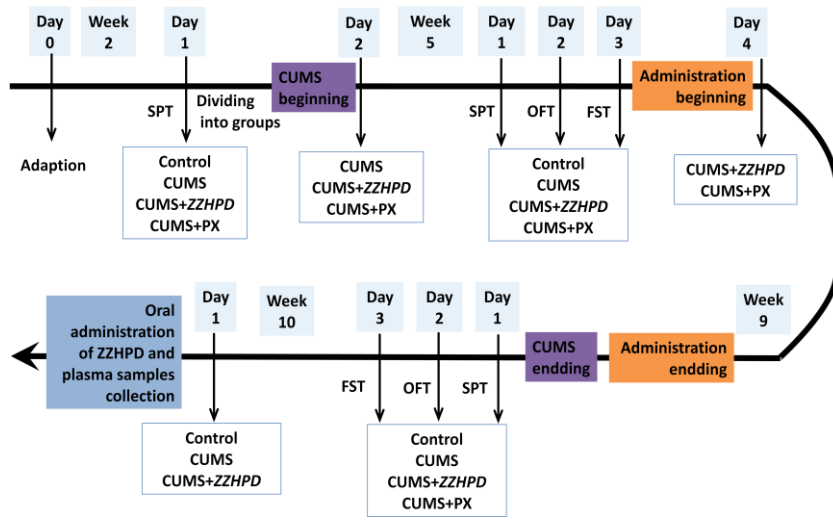

**FIGURE S1.** The animal experimental design of this study (10 weeks).

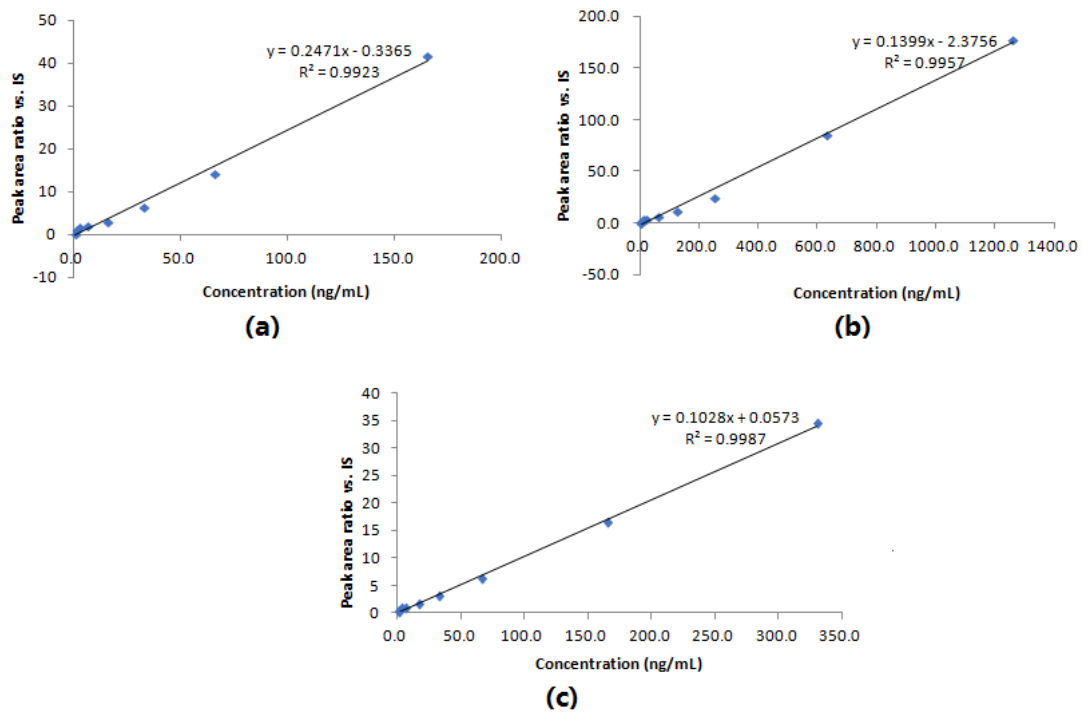

**FIGURE S2:** The standard curves of narirutin (a), naringin (b) and honokiol (c) ( $r > 0.99$ ).

**TABLE S1:** The intra-day and Inter-day precision, accuracy, extraction recovery and matrix effects of three analytes at low, middle and high concentration.

| Analytes  | Concentration<br>(ng/mL) | Intra-day<br>precision<br>RSD (%) | Inter-day<br>precision<br>RSD (%) | Accuracy<br>RE (%) | Extraction<br>recovery (%,<br>mean $\pm$ SD) | Matrix effects<br>(%, mean $\pm$ SD) |
|-----------|--------------------------|-----------------------------------|-----------------------------------|--------------------|----------------------------------------------|--------------------------------------|
| Narirutin | 2.5                      | 0.45                              | 1.31                              | 3.45               | 92.25 $\pm$ 4.21                             | 94.87 $\pm$ 2.17                     |
|           | 20.0                     | 0.96                              | 0.75                              | -4.16              | 93.56 $\pm$ 1.79                             | 95.67 $\pm$ 3.01                     |
|           | 265.0                    | 1.39                              | 2.11                              | 6.16               | 98.23 $\pm$ 5.36                             | 95.06 $\pm$ 1.29                     |
| Naringin  | 9.5                      | 0.59                              | 0.73                              | 7.35               | 89.62 $\pm$ 2.76                             | 89.05 $\pm$ 2.85                     |
|           | 76.0                     | 0.28                              | 0.33                              | -5.21              | 90.72 $\pm$ 3.75                             | 93.05 $\pm$ 0.87                     |
|           | 1011.2                   | 1.57                              | 2.01                              | 7.91               | 99.69 $\pm$ 5.56                             | 97.28 $\pm$ 0.96                     |
| Honokiol  | 2.5                      | 2.39                              | 2.14                              | 4.83               | 91.92 $\pm$ 1.03                             | 93.72 $\pm$ 0.56                     |
|           | 20.0                     | 1.56                              | 1.74                              | 8.14               | 95.12 $\pm$ 2.06                             | 93.52 $\pm$ 3.15                     |
|           | 264.0                    | 2.17                              | 1.78                              | -7.28              | 104.71 $\pm$ 3.43                            | 89.51 $\pm$ 3.25                     |

**TABLE S2:** The stability of three analytes at low, middle and high concentration.

| Analytes  | Concentration<br>(ng/mL) | Stability at room temperature<br>for 4 h |         | Stability in autosampler for<br>12 h |         | Stability of repeated<br>freeze-thaw for three times |         | Stability at -20°C for 14 days |         |
|-----------|--------------------------|------------------------------------------|---------|--------------------------------------|---------|------------------------------------------------------|---------|--------------------------------|---------|
|           |                          | RE (%)                                   | RSD (%) | RE (%)                               | RSD (%) | RE (%)                                               | RSD (%) | RE (%)                         | RSD (%) |
| Narirutin | 2.5                      | 5.98                                     | 3.71    | 8.10                                 | 2.50    | 9.38                                                 | 4.82    | -6.11                          | 5.92    |
|           | 20.0                     | 7.81                                     | 2.53    | 10.03                                | 2.97    | -8.32                                                | 3.72    | 9.32                           | 6.21    |
|           | 265.0                    | -5.32                                    | 2.11    | -4.02                                | 1.18    | -3.21                                                | 1.07    | 1.05                           | 4.02    |
| Naringin  | 9.5                      | 6.01                                     | 4.78    | -5.22                                | 1.57    | 8.93                                                 | 4.19    | 5.32                           | 7.29    |
|           | 76.0                     | -4.01                                    | 1.76    | 5.91                                 | 3.50    | 4.73                                                 | 2.89    | -3.02                          | 5.83    |
|           | 1011.2                   | 6.38                                     | 0.92    | 4.39                                 | 0.31    | 5.22                                                 | 0.31    | 4.61                           | 3.49    |
| Honokiol  | 2.5                      | 9.96                                     | 4.21    | -3.29                                | 0.90    | 3.02                                                 | 3.78    | 7.65                           | 8.46    |
|           | 20.0                     | -7.53                                    | 2.41    | 4.41                                 | 0.04    | 5.92                                                 | 2.15    | -3.87                          | 5.15    |
|           | 264.0                    | 3.29                                     | 1.55    | -2.13                                | 1.90    | 1.01                                                 | 2.37    | 3.69                           | 2.44    |
